# Supplementary material for: A Primer Genetic Toolkit for Exploring Mitochondrial Biology and Disease Using Zebrafish
Source: MDPI journal article supplement (doi:10.3390/genes13081317), 2022-07-23
Supplement: s1 [file s1]

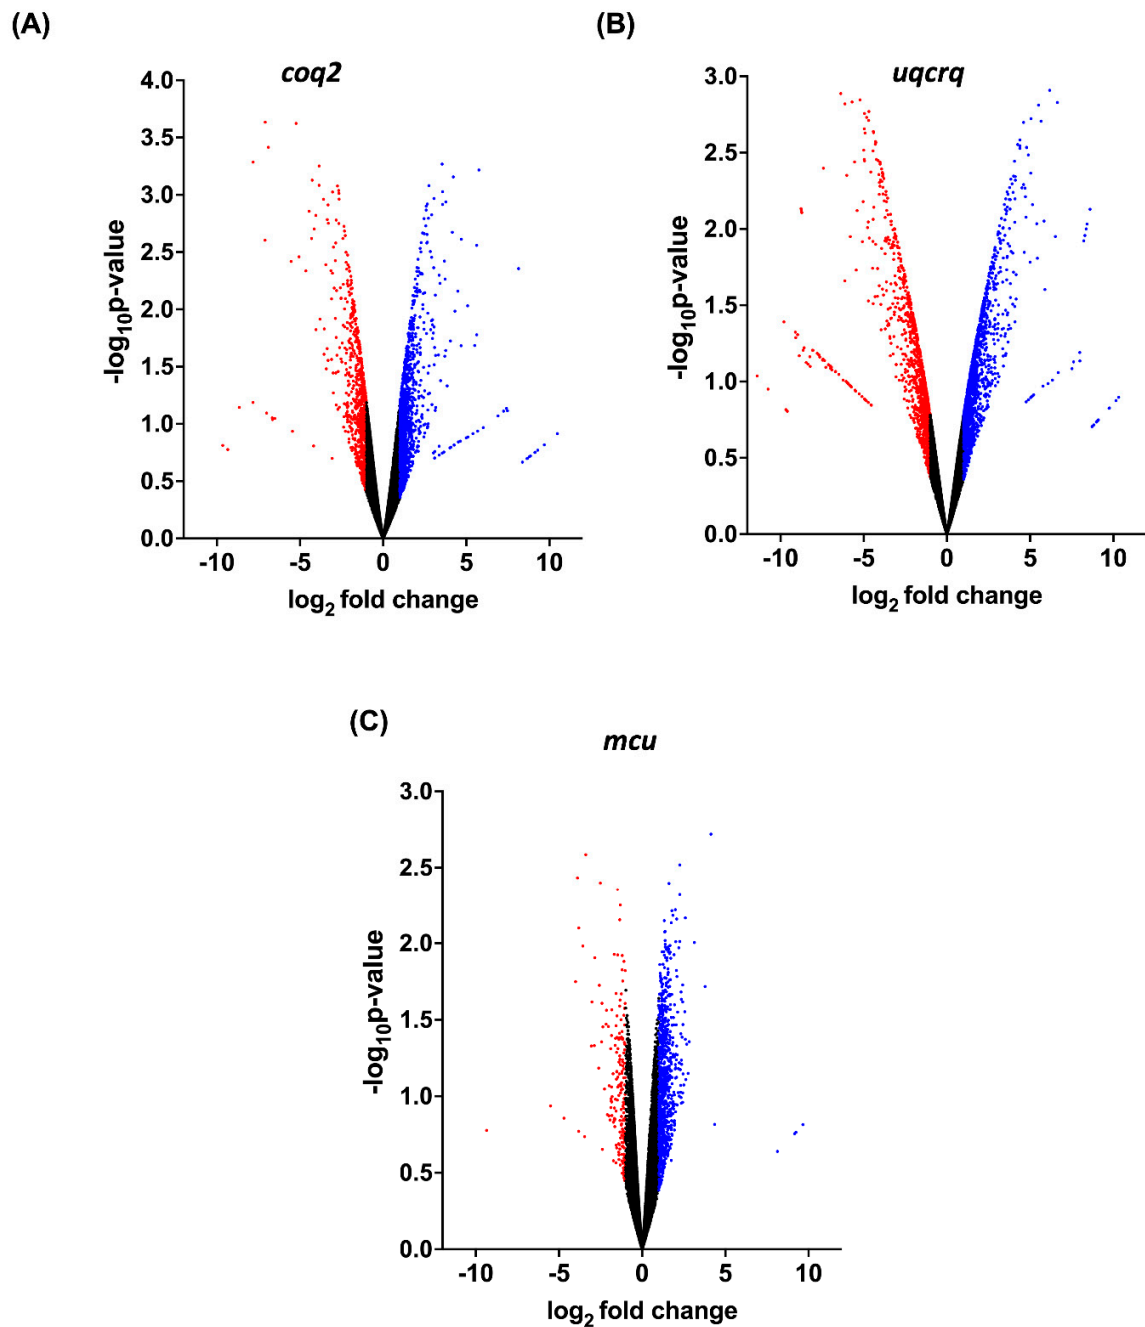

**Supplementary Figure S1:** RNAseq of *coq2*, *uqcrq*, and *mcu* homozygous mutants. (A–C) Volcano plot of differentially expressed genes in the homozygous mutants.  $\log_2$  of fold change and  $-\log_{10}$  of p-value is represented on the x-axis and y-axis, respectively. The red dots represent the downregulated genes, and the blue dots represent the upregulated genes.
